# Supplementary material for: Structure of the SecY Complex Unlocked by a Preprotein Mimic
Source: PubMed Central journal article supplement — Cell Rep. 2012 Jan 26;1(1):21–8. doi: 10.1016/j.celrep.2011.11.003 (PMC3333808; doi:10.1016/j.celrep.2011.11.003), 2012-01-26
Supplement: mmc1.pdf [file mmc1.pdf]

---

**Table S1. Electron Crystallographic Data**

---

|                                              |                                      |
|----------------------------------------------|--------------------------------------|
| Plane Group                                  | p12 <sub>1-b</sub>                   |
| Unit-cell dimensions                         | a= 112.3, b= 57.9, $\gamma=90^\circ$ |
| Number of Images <sup>a</sup>                | 76                                   |
| Resolution in plane                          | 8 Å                                  |
| Resolution in z direction <sup>b</sup>       | 17 Å                                 |
| Total no. of observations <sup>c</sup>       | 4257                                 |
| Overall Weighted Phase Residual <sup>c</sup> | 22.3°                                |

---

<sup>a</sup> Distribution of tilt angles: 0-10°, 23 images; 10°-20°, 6 images; 20°-30°, 3 images; 30°-40°, 14 images; 40°-50°, 17 images; 50°-60°, 13 images.

<sup>b</sup> As calculated from the point-spread function of the experimental data (Unger and Schertler, 1995).

<sup>c</sup> By program LATLINEK (Gipson et al., 2007).
